# Supplementary material
Source: PubMed Central journal article supplement (PMC2801867)
Supplement: NIHMS131312-supplement-1.pdf [file NIHMS131312-supplement-1.pdf]

## **SUPPLEMENTAL MATERIAL**

Online supplemental materials for “Comprehensive Desmosome Mutation Analysis in North Americans with Arrhythmogenic Right Ventricular Dysplasia/Cardiomyopathy”

A. Dénise den Haan, et al; CIRCULATIONAHA/2009/858217

**Supplemental Methods:** None. All methods are provided in the text.

**Supplemental Tables:**

Supplemental Table 1 - Clinical and genetic characteristics of patients with ARVD/C

Supplemental Table 2 – Non-conserved desmosome variants excluded as mutations

Supplemental Table 3 - Clinical and genetic characteristics of patients with suspected  
ARVD/C

**Supplemental Figures:** None

**Supplemental References:** None

**Supplemental Table I: Clinical and genetic characteristics of patients with ARVD/C**

| Case | Gene                 | Nucleotide change                    | Gender | Age first symptom | Family History | Depol | Repol | Arrhyth | Struct | Tissue |
|------|----------------------|--------------------------------------|--------|-------------------|----------------|-------|-------|---------|--------|--------|
| 1    | PKP2                 | c.145_148delCAGA                     | M      | 28                | -              | ++    | +     | -       | ++     | -      |
| 2    | PKP2                 | c.145_148delCAGA                     | M      | 31                | ++             | ++    | +     | +       | ++     | ND     |
| 3    | PKP2                 | c.235C>T                             | F      | 26                | -              | +     | +     | +       | +      | ND     |
| 4    | PKP2                 | c.235C>T                             | F      | ?                 | +              | -     | +     | +       | +      | -      |
| 5    | PKP2                 | c.1171-2A>G                          | M      | 19                | ++             | ++    | +     | +       | ++     | ND     |
| 6    | PKP2                 | c.1237C>T                            | F      | 33                | +              | +     | +     | -       | +      | ND     |
| 7    | PKP2                 | c.1271T>C                            | F      | 30                | +              | -     | +     | +       | +      | -      |
| 8    | PKP2                 | c.1307_1315deHins8                   | M      | 22                | -              | +     | +     | +       | +      | ND     |
| 9    | PKP2                 | c.1368delA                           | F      | 15                | -              | +     | +     | +       | ++     | -      |
| 10   | PKP2                 | c.1613G>A                            | F      | 18                | -              | +     | +     | +       | ++     | ND     |
| 11   | PKP2                 | c.1613G>A                            | M      | 30                | -              | +     | +     | +       | ++     | ND     |
| 12   | PKP2                 | c.1613G>A                            | M      | 35                | -              | ++    | +     | +       | +      | +      |
| 13   | PKP2                 | c.1613G->A                           | M      | 26                | -              | ++    | +     | +       | ++     | ND     |
| 14   | PKP2                 | c.1613G->A                           | M      | 45                | -              | ++    | +     | +       | ++     | ND     |
| 15   | PKP2                 | c.1643delG                           | M      | 30                | ++             | -     | +     | -       | +      | ND     |
| 16   | PKP2                 | c.2013delC                           | F      | 11                | +              | +     | +     | +       | ++     | -      |
| 17   | PKP2                 | c.2146-1G->C                         | M      | 20                | +              | ++    | +     | +       | -      | ND     |
| 18   | PKP2                 | c.2146-1G->C                         | M      | 31                | ++             | ++    | +     | +       | +      | ND     |
| 19   | PKP2                 | c.2146-1G->C                         | M      | 26                | -              | ++    | +     | +       | ++     | ++     |
| 20   | PKP2                 | c.2146-1 G>C                         | F      | 34                | +              | +     | +     | +       | +      | ND     |
| 21   | PKP2                 | c.2146-1G->C                         | F      | 34                | -              | ++    | +     | -       | ++     | ND     |
| 22   | PKP2                 | c.2146-1G->C                         | M      | 47                | -              | ++    | +     | +       | +      | ND     |
| 23   | PKP2                 | c.2146-1G->C                         | M      | 30                | +              | ++    | +     | +       | ++     | ND     |
| 24   | PKP2                 | c.2146-1G->C                         | M      | 41                | -              | ++    | +     | +       | ++     | -      |
| 25   | PKP2                 | c.2197_2202delinsG                   | F      | 32                | +              | +     | +     | +       | +      | -      |
| 26   | PKP2                 | c.2197_2202delinsG                   | M      | 25                | -              | ++    | +     | +       | ++     | ND     |
| 27   | PKP2                 | c.2197_2202delinsG                   | M      | 56                | -              | ++    | -     | +       | ++     | ND     |
| 28   | PKP2                 | c.2359C>T                            | M      | 52                | -              | ++    | +     | +       | +      | -      |
| 29   | PKP2                 | c.2489+1G>A                          | M      | 22                | ++             | ++    | +     | +       | +      | ND     |
| 30   | PKP2                 | c.2489+1G->A                         | F      | 38                | -              | ++    | +     | +       | ++     | -      |
| 31   | PKP2                 | c.2489+1G->A                         | M      | 51                | ++             | +     | -     | -       | +      | ND     |
| 32   | PKP2                 | c.2489+1G->T                         | M      | 24                | -              | +     | +     | +       | +      | ND     |
| 33   | DSG2                 | c.137G>A                             | M      | 11                | -              | -     | +     | +       | ++     | +      |
| 34   | DSG2                 | c.1520 G->A                          | M      | 38                | -              | +     | +     | +       | ++     | ND     |
| 35   | DSG2                 | c.2434G>T                            | F      | 23                | ++             | -     | +     | -       | +      | ND     |
| 36   | DSP                  | c.1331 A>G                           | F      | 24                | -              | -     | +     | +       | +      | ++     |
| 37   | JUP                  | c.56C>T                              | M      | 17                | -              | ++    | +     | +       | +      | ND     |
| 38   | PKP2                 | c.2484C>T (homozygous)               | M      | 23                | -              | +     | +     | +       | ++     | ND     |
| 39   | PKP2<br>DSG2         | c.145_148delCAGA<br>c.1003A>G        | M      | 27                | -              | +     | +     | +       | +      | -      |
| 40   | PKP2<br>DSG2         | c.1237C>T<br>c.829 -1_835del         | M      | 22                | -              | +     | +     | +       | +      | ND     |
| 41   | PKP2<br>PKP2         | c.1759G>A<br>c.2145+1G->C            | M      | 64                | -              | ++    | +     | +       | ++     | ND     |
| 42   | DSG2<br>DSG2         | c.146 G->A<br>c.918 G->A             | M      | 24                | -              | +     | +     | +       | ++     | ND     |
| 43   | PKP2<br>PKP2<br>DSG2 | c.419C>T<br>c.2146-1G->C<br>c.166G>A | M      | 50                | -              | +     | +     | +       | ++     | ++     |
| 44   |                      |                                      | F      | 2                 | -              | -     | +     | +       | +      | ++     |
| 45   |                      |                                      | M      | 18                | ++             | -     | -     | +       | ++     | ND     |
| 46   |                      |                                      | M      | 14                | -              | ++    | +     | +       | ++     | ND     |
| 47   |                      |                                      | M      | 13                | -              | -     | +     | +       | ++     | -      |
| 48   |                      |                                      | M      | 18                | +              | +     | -     | +       | +      | ++     |
| 49   |                      |                                      | F      | 27                | ++             | +     | +     | -       | +      | -      |
| 50   |                      |                                      | M      | 22                | -              | ++    | +     | -       | +      | ND     |
| 51   |                      |                                      | M      | 35                | -              | ++    | +     | +       | +      | ND     |

|    |  |  |   |    |    |    |   |   |    |    |
|----|--|--|---|----|----|----|---|---|----|----|
| 52 |  |  | F | 31 | ++ | -  | + | - | +  | -  |
| 53 |  |  | M | 31 | -  | ++ | + | + | +  | ND |
| 54 |  |  | F | 29 | -  | +  | + | + | ++ | ND |
| 55 |  |  | F | 40 | ++ | +  | + | + | +  | -  |
| 56 |  |  | F | 28 | +  | ++ | + | + | +  | ++ |
| 57 |  |  | F | 38 | -  | +  | + | + | +  | -  |
| 58 |  |  | F | 35 | ++ | ++ | - | - | +  | ND |
| 59 |  |  | M | 43 | ++ | +  | - | - | +  | -  |
| 60 |  |  | F | 36 | -  | ++ | - | + | +  | -  |
| 61 |  |  | M | 42 | -  | ++ | + | - | ++ | ++ |
| 62 |  |  | M | 41 | -  | ++ | + | - | +  | -  |
| 63 |  |  | M | 40 | -  | ++ | + | + | ++ | ++ |
| 64 |  |  | F | 41 | -  | +  | + | + | +  | ND |
| 65 |  |  | M | 47 | ++ | +  | + | - | +  | ND |
| 66 |  |  | F | 41 | -  | +  | + | + | ++ | ND |
| 67 |  |  | F | 48 | ++ | -  | + | + | ++ | ND |
| 68 |  |  | F | 41 | -  | -  | + | + | ++ | ND |
| 69 |  |  | F | 24 | -  | ++ | + | + | +  | ND |
| 70 |  |  | F | 43 | -  | -  | + | - | +  | ++ |
| 71 |  |  | F | 43 | ++ | +  | + | - | +  | ND |
| 72 |  |  | M | 48 | +  | ++ | + | + | -  | ND |
| 73 |  |  | F | 53 | ++ | -  | + | - | +  | ND |
| 74 |  |  | F | 42 | -  | -  | + | + | ++ | ND |
| 75 |  |  | F | 41 | -  | +  | + | + | +  | ND |
| 76 |  |  | F | 45 | -  | ++ | + | + | ++ | ND |
| 77 |  |  | M | 46 | -  | ++ | + | - | ++ | ND |
| 78 |  |  | F | 51 | ++ | +  | + | + | -  | -  |
| 79 |  |  | M | 30 | ++ | -  | - | + | +  | -  |
| 80 |  |  | M | 63 | -  | -  | + | + | ++ | ND |
| 81 |  |  | M | 57 | -  | ++ | + | + | ++ | ++ |
| 82 |  |  | M | 76 | -  | -  | - | - | ++ | ++ |

Each individual is listed with a unique case number. Gene indicates the gene in which a mutation was identified. The six categories for criteria are shown as Family History, Depolarization abnormalities (Depol), Repolarization abnormalities (Repol), Arrhythmia (Arrhyth), Structural RV disease (Struct), and tissue. For these columns, '+' indicates meeting a minor criterion, '++' indicates meeting a major criterion, and '?' indicates that they were not adequately tested for that criterion.

## Supplemental Figure 2

Non-conserved desmosome protein variants excluded due to presence in controls or lack of conservation:

| <i>PKP2</i> | <i>DSP</i> | <i>DSC2</i>  | <i>DSG2</i> | <i>JUP</i> |
|-------------|------------|--------------|-------------|------------|
| p.D26N      | p.I305F    | p.N11S       | p.V158G     | p.R142H    |
| p.S70I      | p.A1505V   | p.Q638H      | p.E713K     | p.V648I    |
| p.A195V     | p.Y1512C   | p.A596V      | p.H790Y     | p.M697L    |
| p.P276S     | p.N1526K   | p.I776V      | p.S883F     |            |
| p.P366L     | p.R1537C   | p.R798Q      | p.S1098C    |            |
| p.A372P     | p.R1738Q   | p.A897fsX900 |             |            |
| p.T526M     |            |              |             |            |
| p.I531S     |            |              |             |            |
| p.A830P*    |            |              |             |            |

\* refers to a nucleotide alteration which may alter splicing though mRNA was not available to test further

**Supplemental Table 3: Clinical and genetic characteristics of patients with probable ARVD/C**

| Case | Gene        | Nucleotide change | Gender | Age first symptom | Family History | Depol | Repol | Arrhyth | Struct | Tissue | Minor criteria | Major criteria |
|------|-------------|-------------------|--------|-------------------|----------------|-------|-------|---------|--------|--------|----------------|----------------|
| 1    | <i>PKP2</i> | c.145_148delCAGA  | F      | 38                | -              | -     | +     | +       | +      | ND     | 3              | 0              |
| 2    | <i>PKP2</i> | c.216insG         | M      | 46                | ++             | +     | -     | -       | -      | ND     | 1              | 1              |
| 3    | <i>PKP2</i> | c.2146-1G>C       | F      | 16                | -              | -     | +     | +       | +      | ND     | 3              | 0              |
| 4    | <i>PKP2</i> | c.2509delA        | M      | 21                | +              | -     | +     | -       | +      | ND     | 3              | 0              |
| 5    | <i>DSG2</i> | c.146G>A          | M      | 38                | -              | -     | +     | +       | +      | ND     | 3              | 0              |
| 6    |             |                   | M      | 28                | -              | ++    | -     | -       | +      | ND     | 1              | 1              |
| 7    |             |                   | F      | 26                | -              | -     | +     | +       | +      | ND     | 3              | 0              |
| 8    |             |                   | M      | 36                | -              | ++    | -     | -       | +      | ND     | 1              | 1              |
| 9    |             |                   | M      | 29                | ++             | +     | -     | -       | -      | ND     | 1              | 1              |
| 10   |             |                   | F      | 36                | -              | -     | -     | +       | +      | ND     | 2              | 0              |
| 11   |             |                   | M      | 33                | -              | +     | -     | +       | -      | ND     | 2              | 0              |
| 12   |             |                   | F      | 33                | -              | -     | +     | +       | -      | ND     | 2              | 0              |
| 13   |             |                   | F      | 39                | -              | -     | -     | +       | ++     | -      | 1              | 1              |
| 14   |             |                   | F      | 37                | -              | +     | -     | +       | -      | ND     | 2              | 0              |
| 15   |             |                   | F      | 31                | -              | -     | +     | +       | +      | ND     | 3              | 0              |
| 16   |             |                   | F      | 18                | +              | -     | -     | +       | -      | ND     | 2              | 0              |
| 17   |             |                   | F      | 40                | -              | -     | -     | +       | +      | ND     | 2              | 0              |
| 18   |             |                   | F      | 13                | ++             | -     | -     | -       | +      | ND     | 1              | 1              |

Each individual is listed with a unique case number. Gene indicates the gene in which a mutation was identified. The six categories for criteria are shown as Family History, Depolarization abnormalities (Depol), Repolarization abnormalities (Repol), Arrhythmia (Arrhyth), Structural RV disease (Struct), and tissue. For these columns, '+' indicates meeting a minor criterion, '++' indicates meeting a major criterion, and '?' indicates that they were not adequately tested for that criterion.
